# Supplementary material for: Ab initio investigations of orthogonal ScC2 and ScN2 monolayers as promising anode materials for sodium-ion batteries
Source: Royal Society of Chemistry journal article supplement (doi:10.1039/c9ta00832b), 2019-01-01
Supplement: c9ta00832b1.pdf [file c9ta00832b1.pdf]

## Supporting Information

### Ab-initio Investigations of Orthogonal ScC<sub>2</sub> and ScN<sub>2</sub> Monolayers as Promising Anode Materials for Sodium-Ion Batteries

He Huang,<sup>b</sup> Hong-Hui Wu,<sup>c</sup> Cheng Chi,<sup>b</sup> Baoling Huang<sup>\*b</sup> and Tong-Yi Zhang<sup>\*a</sup>

- a. Shanghai University Materials Genome Institute and Shanghai Materials Genome Institute,  
Shanghai University, 99 Shangda Road, Shanghai 200444, China.
- b. Department of Mechanical and Aerospace Engineering, Hong Kong University of Science  
and Technology, Clear Water Bay, Kowloon, Hong Kong, China.
- c. Department of Chemistry, University of Nebraska-Lincoln, Lincoln, NE 68588, USA.

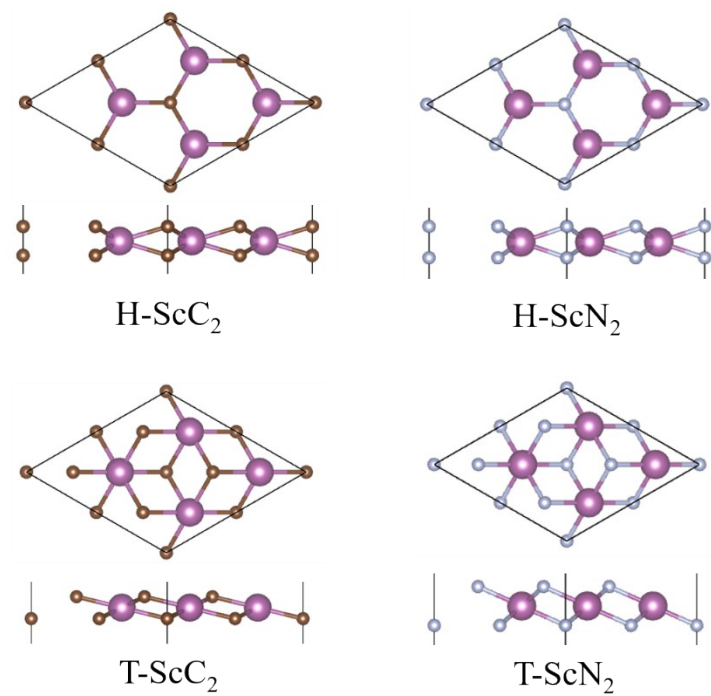

**Figure S1.** Optimized configurations of the H phases and T phases of ScC<sub>2</sub> and ScN<sub>2</sub> 2×2×1 supercell with the top and side perspective. The purple balls represent Sc atoms, brown ones represent C atoms, and white ones represent N atoms.

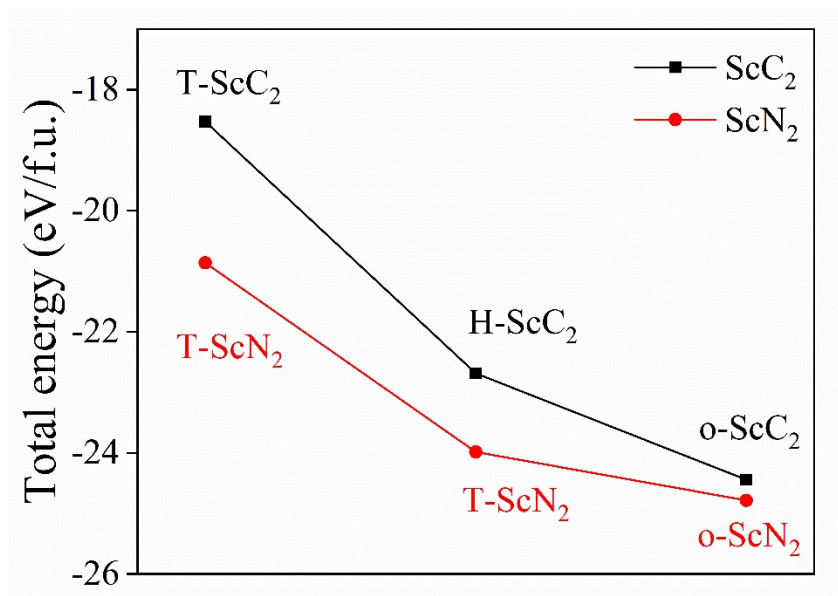

**Figure S2.** The calculated total energies of T phases, H phases and orthogonal phases of ScC<sub>2</sub> and ScN<sub>2</sub>.

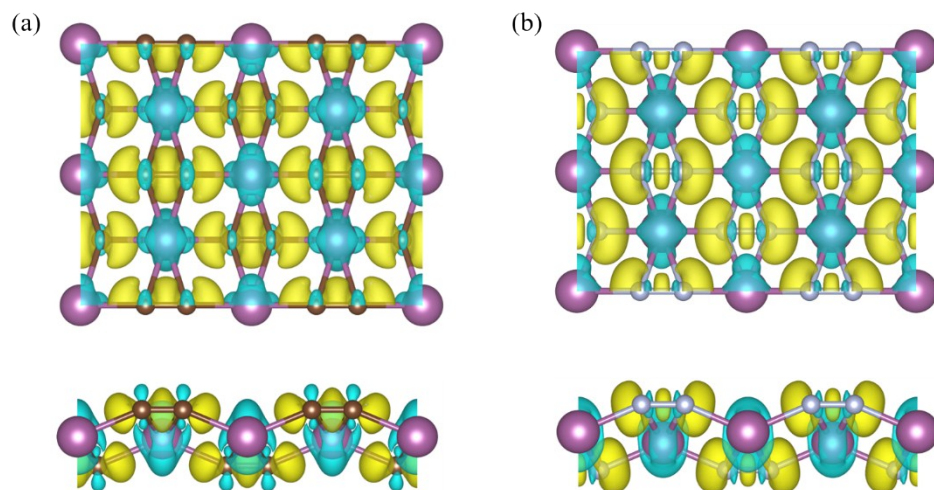

**Figure S3.** Charge density difference of the (a) o-ScC<sub>2</sub> and (b) o-ScN<sub>2</sub> monolayers with an isovalue of 0.01 e/Bohr<sup>3</sup> calculated by Equation 1. The yellow regions mean electron accumulation and blue ones mean electron depletion. The purple balls represent Sc atoms, brown ones represent C atoms, and white ones represent N atoms.

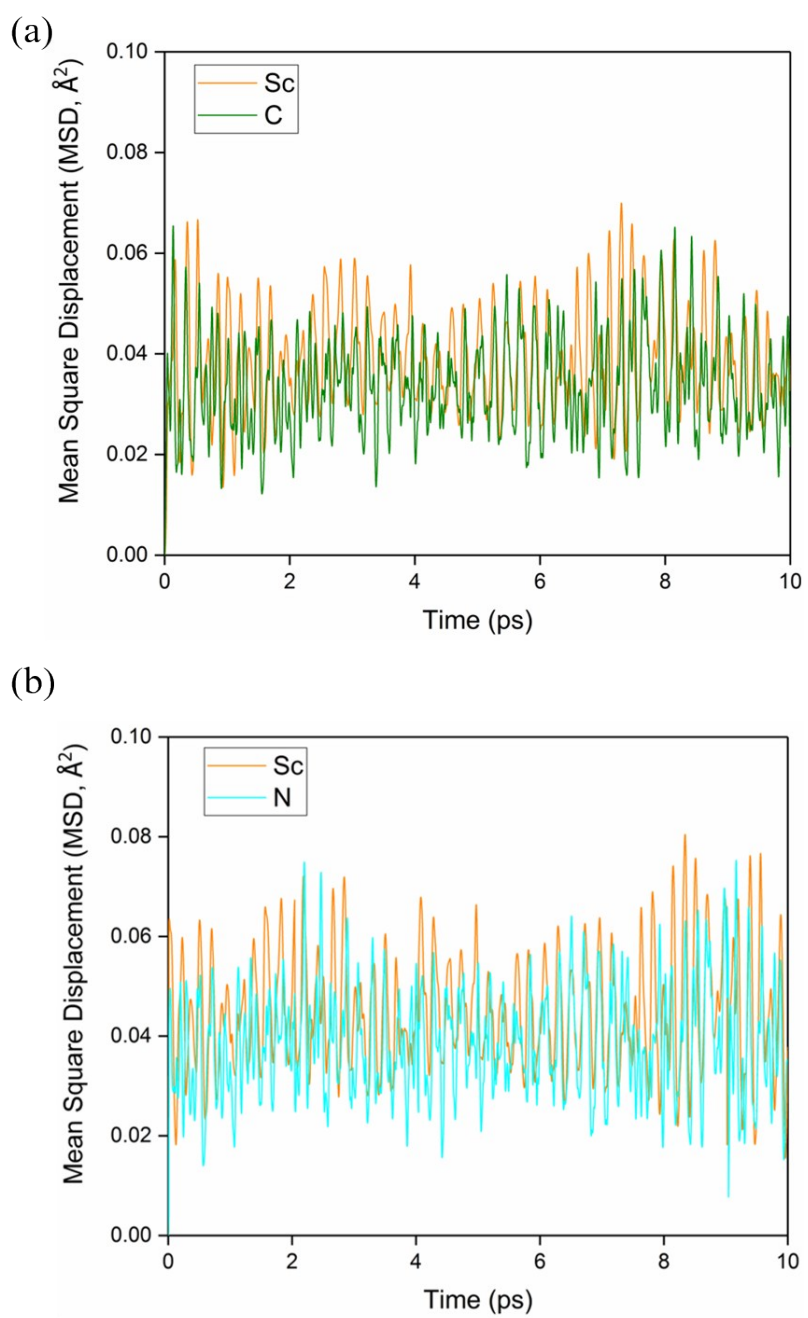

**Figure S4.** Total mean square displacement (MSD) of the (a)  $\text{o-ScC}_2$  and (b)  $\text{o-ScN}_2$   $3 \times 3 \times 1$  supercells with a 10 ps duration by the *ab-initio* MD simulation at 300 K.

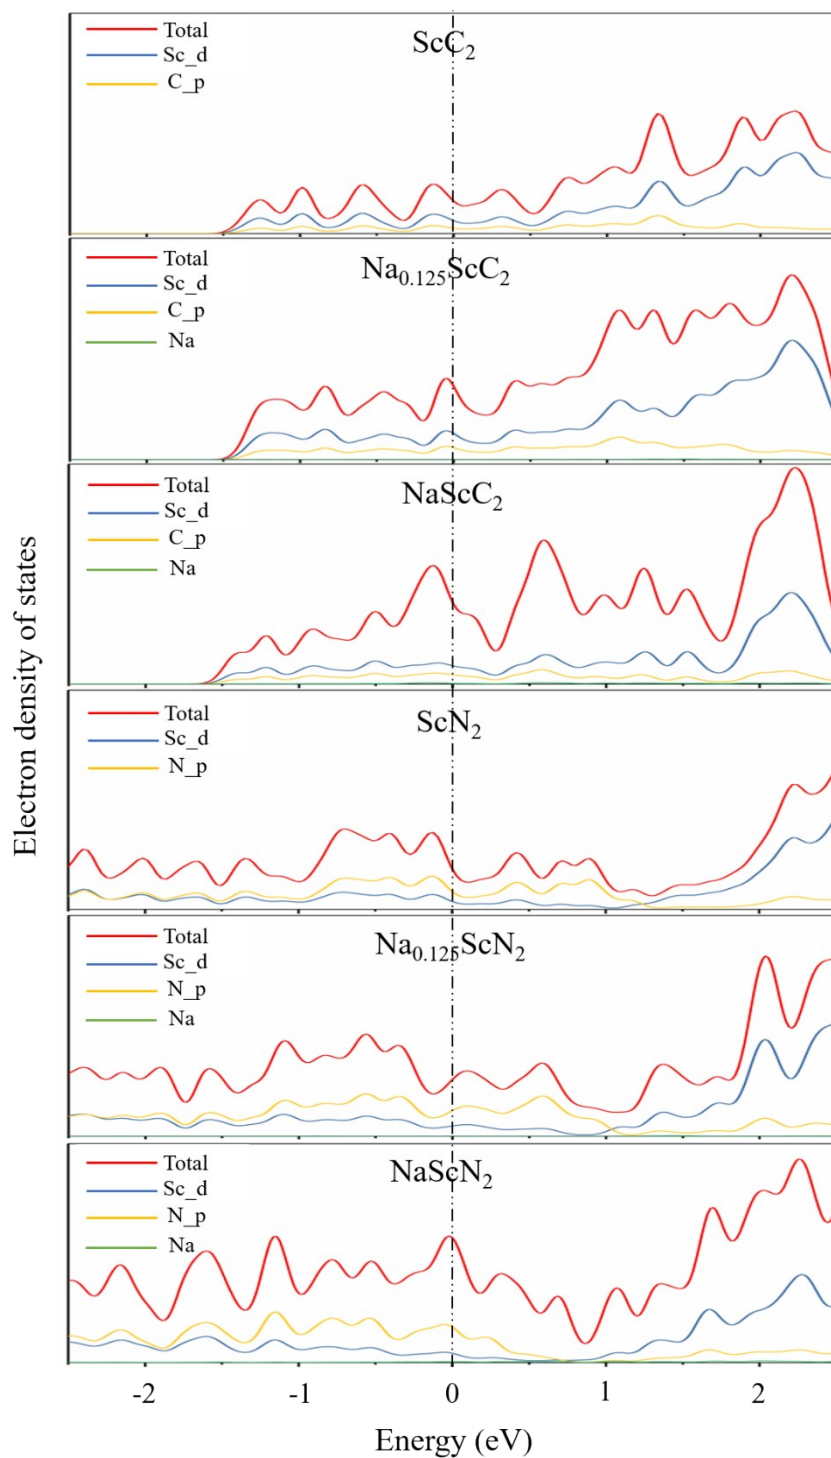

**Figure S5.** Partial electron density of states of  $\text{ScC}_2/\text{Na}_{0.125}\text{ScC}_2/\text{NaScC}_2$  and  $\text{ScC}_2/\text{Na}_{0.125}\text{ScC}_2/\text{NaScC}_2$ , respectively. The Fermi energy level is set to zero energy, marked with the black dotted lines.

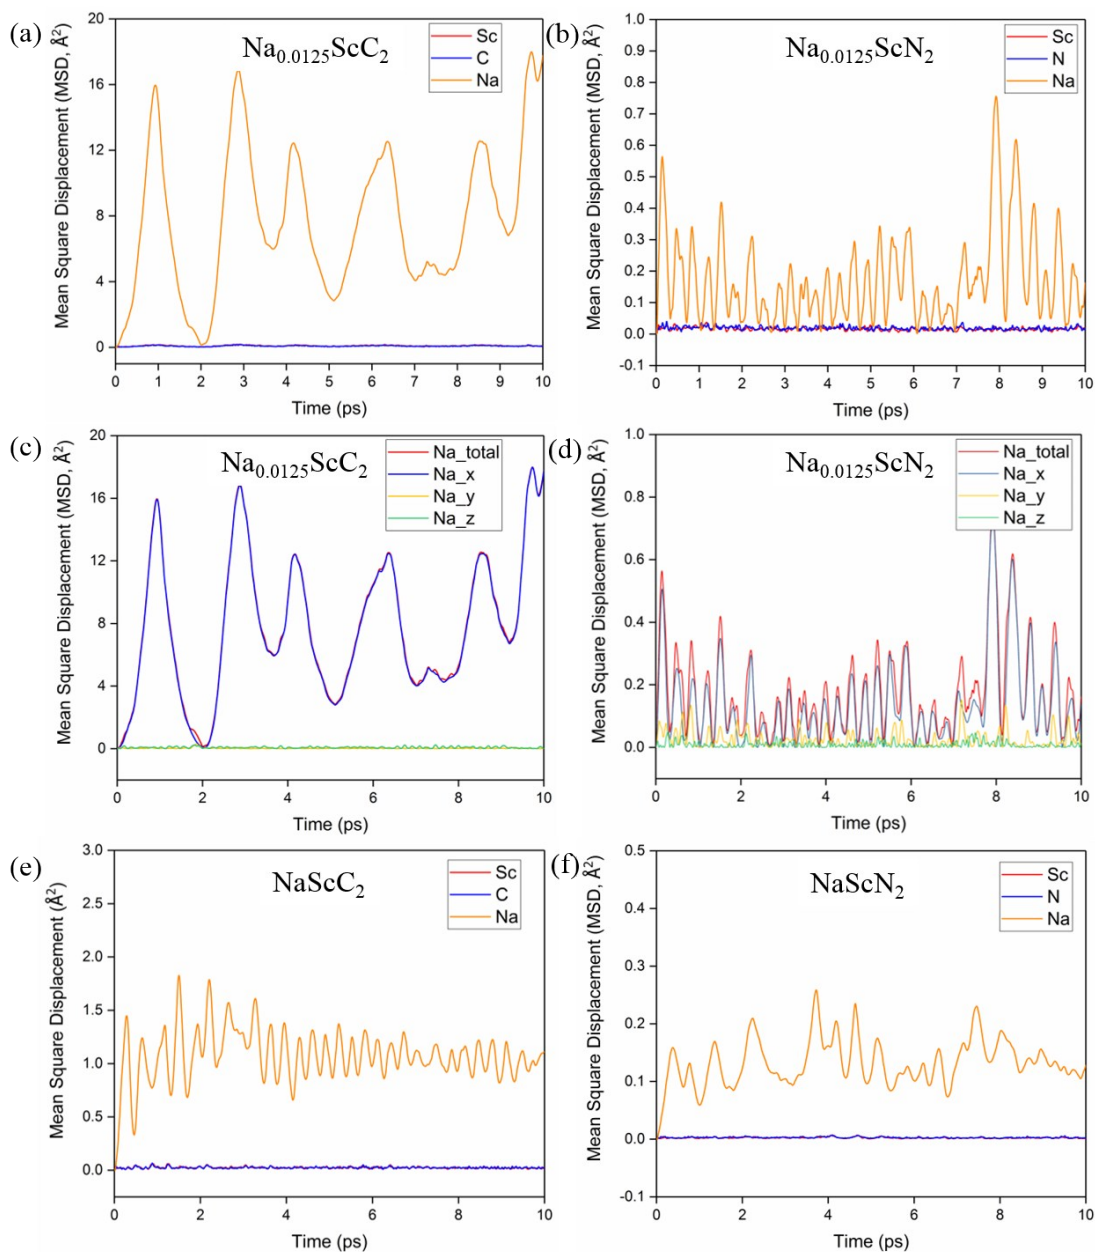

**Figure S6.** (a) and (b) show the mean square displacements (MSD) of all atoms in o- $\text{Na}_{0.0125}\text{ScC}_2$  and o- $\text{Na}_{0.0125}\text{ScN}_2$  monolayers at 300 K. It is clearly demonstrated that energy barrier for Na ion diffusion on o- $\text{ScC}_2$  monolayer is much lower than that on o- $\text{ScN}_2$  monolayer because of over 40 times higher MSD value of Na ions (orange line). (c) and (d) decompose the MSD of Na ion got from (a) and (b). It is observed that MSD value of Na ions is mostly attributed by the Na ion diffusion along the x direction, which is corresponding to the Path 2, the most favourable pathway for Na ion diffusion on the o- $\text{ScC}_2$  and o- $\text{ScN}_2$  monolayers. (e) and (f) show the MSD of o- $\text{NaScC}_2$

and o-NaScN<sub>2</sub> monolayers with a relatively high Na ion concentration. All AIMD simulations prove the thermodynamic stability of both o-ScC<sub>2</sub> and o-ScN<sub>2</sub> monolayers with low and high concentration Na ion adsorption.

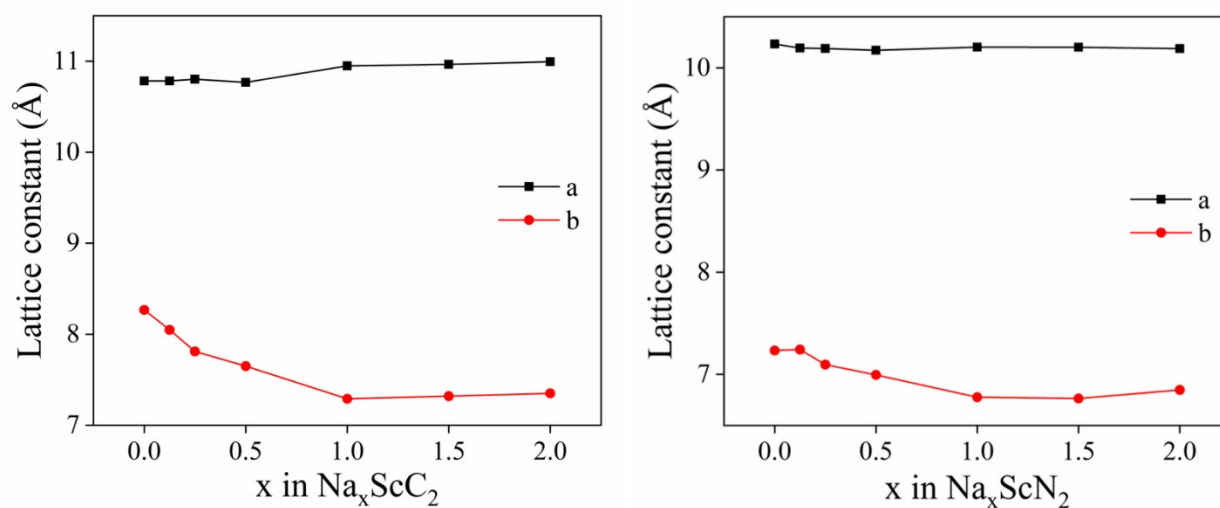

**Figure S7.** The in-plane lattice constants of  $\text{Na}_x\text{ScC}_2$  and  $\text{Na}_x\text{ScN}_2$  with different concentration of Na ions adsorption.



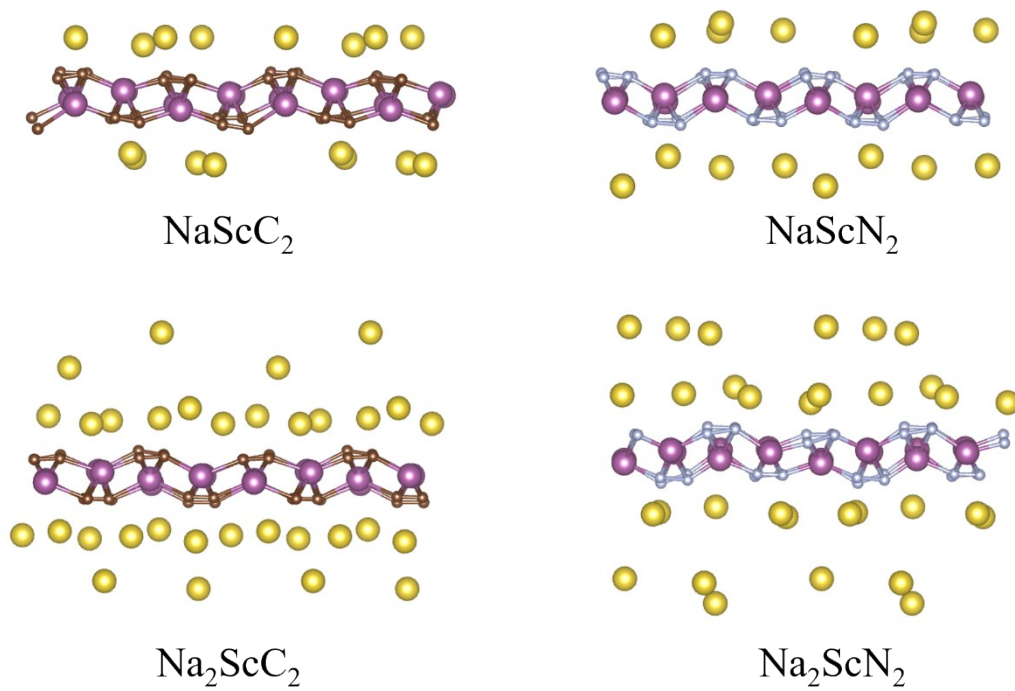

**Figure S8.** The configurational snapshots of NaScC<sub>2</sub>, Na<sub>2</sub>ScC<sub>2</sub>, NaScN<sub>2</sub> and Na<sub>2</sub>ScN<sub>2</sub> at 800 K in the end of 10 ps AIMD simulations.

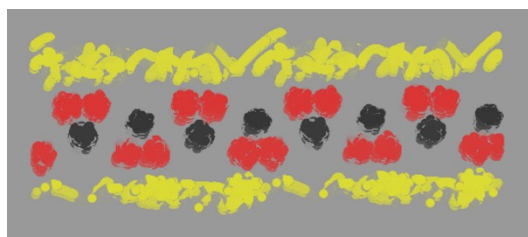

NaScC<sub>2</sub>

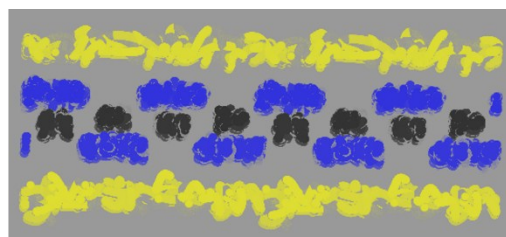

NaScN<sub>2</sub>

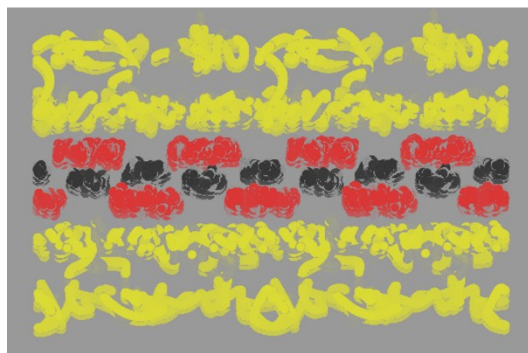

Na<sub>2</sub>ScC<sub>2</sub>

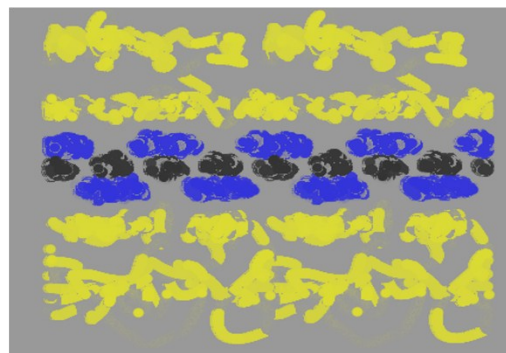

Na<sub>2</sub>ScN<sub>2</sub>

**Figure S9.** The atomic trajectories of NaScC<sub>2</sub>, Na<sub>2</sub>ScC<sub>2</sub>, NaScN<sub>2</sub> and Na<sub>2</sub>ScN<sub>2</sub> monolayers with the accumulation of the final 4000 AIMD simulation steps at 800 K. The black dots represent Sc atoms, the red dots represent C atoms, the blue dots represent N atoms, and the yellow dots represent Na atoms.

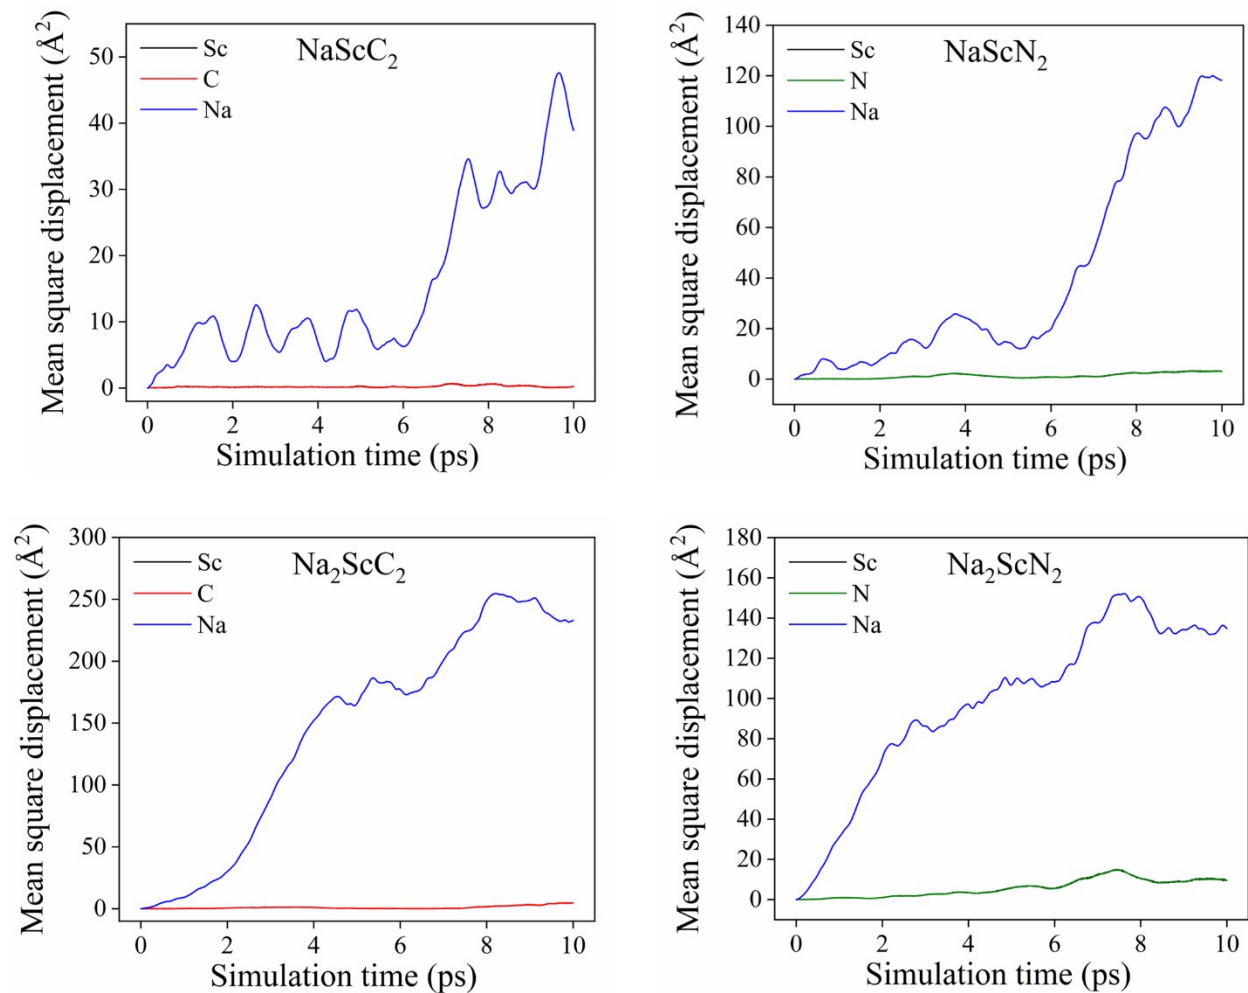

**Figure S10.** The total mean square displacements (MSD) of all atoms in NaScC<sub>2</sub>, Na<sub>2</sub>ScC<sub>2</sub>, NaScN<sub>2</sub> and Na<sub>2</sub>ScN<sub>2</sub> monolayers at 800 K. The AIMD simulations prove the thermodynamic stability of both o-ScC<sub>2</sub> and o-ScN<sub>2</sub> monolayers with relatively high concentration Na ion adsorption.
